# Supplementary material for: Screening Tools for Early Identification of Adults at High Risk of Type 2 Diabetes: A Scoping Review
Source: MDPI journal article supplement (doi:10.3390/healthcare14070839), 2026-03-25
Supplement: s1 [file Table S2. Complete search strategies used in each database.pdf › Table S2. Complete search strategies used in each database.pdf]

**Table S2. Complete search strategies used in each database\*.**

| Database                       | Search Date    | Full Search Strategy                                                                                                                                                                                                                                                                                                                                                                                                                                                                                                                              |
|--------------------------------|----------------|---------------------------------------------------------------------------------------------------------------------------------------------------------------------------------------------------------------------------------------------------------------------------------------------------------------------------------------------------------------------------------------------------------------------------------------------------------------------------------------------------------------------------------------------------|
| Scopus                         | 7 January 2026 | TITLE-ABS-KEY(adult*) AND TITLE-ABS-KEY("risk score*" OR "risk assessment" OR "screening tool*" OR "screening questionnaire*" OR "prediction model*" OR "risk calculator*" OR "diagnostic tool*") AND TITLE-ABS-KEY("type 2 diabetes" OR T2D OR NIDDM)                                                                                                                                                                                                                                                                                            |
| ScienceDirect                  | 7 January 2026 | adult* AND ("risk score*" OR "screening tool*" OR "prediction model*" OR "risk calculator*") AND ("type 2 diabetes" OR T2D)                                                                                                                                                                                                                                                                                                                                                                                                                       |
| Web of Science Core Collection | 7 January 2026 | (adult* AND ("risk score*" OR "screening tool*" OR "prediction model*" OR "risk calculator*") AND ("type 2 diabetes" OR T2D OR NIDDM)) AND TS=("early diagnos*" OR undiagnos* OR prediabet* OR "high risk")                                                                                                                                                                                                                                                                                                                                       |
| PubMed (MEDLINE)               | 6 January 2026 | ((adult*[Title/Abstract] OR individual*[Title/Abstract] OR subject*[Title/Abstract]) AND (tool*[Title/Abstract] OR "risk score"[Title/Abstract] OR screen*[Title/Abstract] OR scor*[Title/Abstract] OR predict*[Title/Abstract] OR questionnaire*[Title/Abstract])) AND ("Type 2 Diabetes Mellitus"[MeSH] OR "type 2 diabetes"[Title/Abstract] OR T2DM[Title/Abstract] OR NIDDM[Title/Abstract] OR prediabet*[Title/Abstract] OR "high risk"[Title/Abstract] OR identif*[Title/Abstract] OR detect*[Title/Abstract] OR validat*[Title/Abstract])) |

\*Search strategies were adapted to the syntax and search functionality of each database while maintaining the same conceptual structure based on the Population–Concept–Context (PCC) framework.
