# Supplementary material for: Screening Tools for Early Identification of Adults at High Risk of Type 2 Diabetes: A Scoping Review
Source: MDPI journal article supplement (doi:10.3390/healthcare14070839), 2026-03-25
Supplement: s1 [file Table S3. Machine-learning–based models.pdf › Table S3. Machine-learning–based models.pdf]

**Table S3. Methodological characteristics of machine-learning-based models identified in the included studies\*.**

| <b>Study</b>                            | <b>ML architecture</b>                                        | <b>Validation approach</b>                                                                               | <b>Key predictors</b>                                                                         |
|-----------------------------------------|---------------------------------------------------------------|----------------------------------------------------------------------------------------------------------|-----------------------------------------------------------------------------------------------|
| <b>Shankaracharya et al., 2012 [46]</b> | Mixture of Experts neural network                             | Train–test split (training dataset n=1104; validation dataset n=311)                                     | clinical and metabolic variables from hospital records                                        |
| <b>Choi et al., 2014 [52]</b>           | Artificial Neural Network (ANN); Support Vector Machine (SVM) | Internal validation using training dataset (KNHANES 2010) and external validation dataset (KNHANES 2011) | demographic, anthropometric, and clinical predictors (e.g., age, BMI, blood pressure)         |
| <b>Pei et al., 2019 [62]</b>            | J48 decision tree algorithm                                   | Model development using filtered cross-sectional dataset                                                 | demographic, lifestyle, and clinical variables (e.g., age, BMI, hypertension, family history) |
| <b>Abbas et al., 2019 [63]</b>          | Support Vector Machine (SVM) with feature selection (mRMR)    | Train–test split with holdout validation dataset                                                         | OGTT-derived glucose features and demographic variables                                       |

\*Only studies that explicitly reported the machine-learning architecture were included in this table. One study describing a machine-learning–based screening model did not specify the algorithm used and was therefore not included.
